# Supplementary material for: Improving Engagement in Antenatal Health Behavior Programs—Experiences of Women Who Did Not Attend a Healthy Lifestyle Telephone Coaching Program
Source: MDPI journal article supplement (doi:10.3390/nu15081860), 2023-04-12
Supplement: s1 [file s1]

**Table S1 – Non-responders characteristics (n=148)**

| <b>Variable</b>               | <b>Median (range)/Number (%)</b> |
|-------------------------------|----------------------------------|
| Age (years)                   | 33 (21-46)                       |
| Gravida                       |                                  |
| 1                             | 54 (36)                          |
| 2                             | 41 (28)                          |
| 3                             | 23 (16)                          |
| 4                             | 17 (11)                          |
| 5                             | 5 (3)                            |
| 6                             | 5 (3)                            |
| 7                             | 1 (1)                            |
| 9                             | 1 (1)                            |
| 11                            | 1 (1)                            |
| Parity                        |                                  |
| 0                             | 85 (57)                          |
| 1                             | 39 (26)                          |
| 2                             | 13 (9)                           |
| 3                             | 9 (6)                            |
| 5                             | 1 (1)                            |
| 7                             | 1 (1)                            |
| Program Appointments Attended |                                  |
| 0                             | 65 (44)                          |
| 1                             | 58 (39)                          |
| 2                             | 25 (17)                          |
